# Supplementary material for: Bacteriocin Gene-Trait matching across the complete Lactobacillus Pan-genome
Source: PubMed Central journal article supplement (PMC5471241; doi:10.1038/s41598-017-03339-y), 2017-06-14

# Supplementary Information

## Bacteriocin Gene-Trait matching across the complete *Lactobacillus* Pan-genome.

Fergus W. J. Collins<sup>1,2,3</sup>, Paula M. O'Connor<sup>1,2</sup>, Orla O'Sullivan<sup>1,2</sup>, Beatriz Gomez-Sala<sup>1</sup>, Mary C. Rea<sup>1,2</sup>, Colin Hill<sup>2,3</sup> and R. Paul Ross<sup>1,2,3\*</sup>

<sup>1</sup>Teagasc Food Research Centre, Teagasc Moorepark, Fermoy, Cork, Ireland, <sup>2</sup>APC Microbiome Institute, University College Cork, Ireland, <sup>3</sup>Department of Microbiology, University College Cork, Ireland

\* Correspondence: [p.ross@ucc.ie](mailto:p.ross@ucc.ie)

Address: College of Science, Engineering and Food Science (SEFS), University College Cork, Ireland

Phone: 00353214903760

**Supplementary Table 1.** Source of Strains

| Species Name                                         | StrainID     | Source      | Antimicrobial Encoded |
|------------------------------------------------------|--------------|-------------|-----------------------|
| <i>Lactobacillus agilis</i>                          | DSM-20509    | Environment |                       |
| <i>Lactobacillus aquaticus</i>                       | DSM-21051    | Environment |                       |
| <i>Lactobacillus concavus</i>                        | DSM-17758    | Environment |                       |
| <i>Lactobacillus coryniformis torquens</i>           | DSM-20004    | Environment |                       |
| <i>Lactobacillus paracollinoides</i>                 | DSM-15502    | Environment |                       |
| <i>Lactobacillus sharpeae</i>                        | DSM-20505    | Environment |                       |
| <i>Weissella kandleri</i>                            | DSM-20593    | Environment |                       |
| <i>Carnobacterium divergens</i>                      | DSM-20623    | Food        |                       |
| <i>Carnobacterium maltaromaticum</i>                 | DSM-20342    | Food        |                       |
| <i>Carnobacterium maltaromaticum</i>                 | DSM-20722    | Food        | Yes                   |
| <i>Lactobacillus acetotolerans</i>                   | DSM-20749    | Food        |                       |
| <i>Lactobacillus acidifarinae</i>                    | DSM-19394    | Food        |                       |
| <i>Lactobacillus acidipiscis</i>                     | DSM-15836    | Food        | Yes                   |
| <i>Lactobacillus acidipiscis</i>                     | DSM-15353    | Food        |                       |
| <i>Lactobacillus algidus</i>                         | DSM-15638    | Food        |                       |
| <i>Lactobacillus alimentarius</i>                    | DSM-20249    | Food        |                       |
| <i>Lactobacillus bif fermentans</i>                  | DSM-20003    | Food        |                       |
| <i>Lactobacillus capillatus</i>                      | DSM-19910    | Food        |                       |
| <i>Lactobacillus casei</i>                           | DSM-20011    | Food        |                       |
| <i>Lactobacillus collinoides</i>                     | DSM-20515    | Food        |                       |
| <i>Lactobacillus crustorum</i>                       | LMG-23699    | Food        |                       |
| <i>Lactobacillus crustorum</i>                       | JCM-15951    | Food        |                       |
| <i>Lactobacillus curvatus</i>                        | DSM-20019    | Food        |                       |
| <i>Lactobacillus delbrueckii bulgaricus</i>          | DSM-20081    | Food        |                       |
| <i>Lactobacillus delbrueckii delbrueckii</i>         | DSM-20074    | Food        |                       |
| <i>Lactobacillus delbrueckii indicus</i>             | DSM-15996    | Food        |                       |
| <i>Lactobacillus delbrueckii lactis</i>              | DSM-20072    | Food        |                       |
| <i>Lactobacillus farciminis</i>                      | DSM-20184    | Food        |                       |
| <i>Lactobacillus frumenti</i>                        | DSM-13145    | Food        |                       |
| <i>Lactobacillus fuchuensis</i>                      | DSM-14340    | Food        |                       |
| <i>Lactobacillus futsaii</i>                         | JCM-17355    | Food        | Yes                   |
| <i>Lactobacillus hammesii</i>                        | DSM-16381    | Food        |                       |
| <i>Lactobacillus harbinensis</i>                     | DSM-16991    | Food        |                       |
| <i>Lactobacillus helveticus</i>                      | CGMCC-1.1877 | Food        | Yes                   |
| <i>Lactobacillus kefiranofaciens kefiranofaciens</i> | DSM-5016     | Food        |                       |
| <i>Lactobacillus kefiranofaciens kefirgranum</i>     | DSM-10550    | Food        | Yes                   |
| <i>Lactobacillus kefiri</i>                          | DSM-20587    | Food        |                       |
| <i>Lactobacillus kimchicus</i>                       | JCM-15530    | Food        |                       |
| <i>Lactobacillus kimchiensis</i>                     | DSM-24716    | Food        |                       |
| <i>Lactobacillus kisonensis</i>                      | DSM-19906    | Food        |                       |
| <i>Lactobacillus koreensis</i>                       | JCM-16448    | Food        |                       |
| <i>Lactobacillus mindensis</i>                       | DSM-14500    | Food        |                       |

Supplementary Table 1. Continued

|                                          |              |      |     |
|------------------------------------------|--------------|------|-----|
| <i>Lactobacillus namurensis</i>          | DSM-19117    | Food |     |
| <i>Lactobacillus nantensis</i>           | DSM-16982    | Food | Yes |
| <i>Lactobacillus nodensis</i>            | DSM-19682    | Food | Yes |
| <i>Lactobacillus odoratitofui</i>        | DSM-19909    | Food |     |
| <i>Lactobacillus otakiensis</i>          | DSM-19908    | Food |     |
| <i>Lactobacillus panis</i>               | DSM-6035     | Food |     |
| <i>Lactobacillus parabrevis</i>          | LMG-11984    | Food |     |
| <i>Lactobacillus parabrevis</i>          | ATCC-53295   | Food |     |
| <i>Lactobacillus paracasei tolerans</i>  | DSM-20258    | Food |     |
| <i>Lactobacillus parakefiri</i>          | DSM-10551    | Food |     |
| <i>Lactobacillus paralimentarius</i>     | DSM-13238    | Food |     |
| <i>Lactobacillus paralimentarius</i>     | DSM-13961    | Food | Yes |
| <i>Lactobacillus perolens</i>            | DSM-12744    | Food |     |
| <i>Lactobacillus plantarum plantarum</i> | CGMCC-1.2437 | Food | Yes |
| <i>Lactobacillus pontis</i>              | DSM-8475     | Food |     |
| <i>Lactobacillus rapi</i>                | DSM-19907    | Food |     |
| <i>Lactobacillus rossiae</i>             | DSM-15814    | Food |     |
| <i>Lactobacillus sakei carnosus</i>      | DSM-15831    | Food |     |
| <i>Lactobacillus sanfranciscensis</i>    | DSM-20451    | Food |     |
| <i>Lactobacillus secaliphilus</i>        | DSM-17896    | Food |     |
| <i>Lactobacillus selangorensis</i>       | DSM-13344    | Food |     |
| <i>Lactobacillus selangorensis</i>       | ATCC-BAA-66  | Food |     |
| <i>Lactobacillus senmaizukei</i>         | DSM-21775    | Food |     |
| <i>Lactobacillus siliginis</i>           | DSM-22696    | Food |     |
| <i>Lactobacillus spicheri</i>            | DSM-15429    | Food |     |
| <i>Lactobacillus suebicus</i>            | DSM-5007     | Food |     |
| <i>Lactobacillus sunkii</i>              | DSM-19904    | Food |     |
| <i>Lactobacillus tucseti</i>             | DSM-20183    | Food |     |
| <i>Lactobacillus versmoldensis</i>       | DSM-14857    | Food |     |
| <i>Lactobacillus xiangfangensis</i>      | LMG-26013    | Food |     |
| <i>Lactobacillus zymae</i>               | DSM-19395    | Food |     |
| <i>Lactococcus lactis</i>                | LMG-7760     | Food |     |
| <i>Leuconostoc argentinum</i>            | KCTC-3773    | Food | Yes |
| <i>Leuconostoc carnosum</i>              | JB16         | Food |     |
| <i>Leuconostoc citreum</i>               | KM20         | Food |     |
| <i>Leuconostoc fallax</i>                | KCTC-3537    | Food | Yes |
| <i>Leuconostoc gasicomitatum</i>         | LMG-18811    | Food |     |
| <i>Leuconostoc gelidum</i>               | KCTC-3527    | Food | Yes |
| <i>Leuconostoc kimchii</i>               | IMSNU-11154  | Food |     |
| <i>Leuconostoc mesenteroides</i>         | ATCC-8293    | Food |     |
| <i>Leuconostoc pseudomesenteroides</i>   | 4882         | Food |     |
| <i>Pediococcus argentinicus</i>          | DSM-23026    | Food |     |
| <i>Weissella halotolerans</i>            | DSM-20190    | Food |     |
| <i>Weissella minor</i>                   | DSM-20014    | Food |     |
| <i>Weissella viridescens</i>             | DSM-20410    | Food |     |

**Supplementary Table 1.** Continued

---

|                                           |            |              |     |
|-------------------------------------------|------------|--------------|-----|
| <i>Atopobium minutum</i>                  | DSM-20586  | Human/Animal |     |
| <i>Atopobium rimae</i>                    | DSM-7090   | Human/Animal |     |
| <i>Carnobacterium maltaromaticum</i>      | DSM-20730  | Human/Animal | Yes |
| <i>Kandleria vitulina</i>                 | DSM-20405  | Human/Animal | Yes |
| <i>Lactobacillus acidophilus</i>          | DSM-20079  | Human/Animal | Yes |
| <i>Lactobacillus amylophilus</i>          | DSM-20533  | Human/Animal | Yes |
| <i>Lactobacillus amylotrophicus</i>       | DSM-20534  | Human/Animal |     |
| <i>Lactobacillus amylovorus</i>           | DSM-20531  | Human/Animal | Yes |
| <i>Lactobacillus amylovorus</i>           | DSM-16698  | Human/Animal | Yes |
| <i>Lactobacillus animalis</i>             | DSM-20602  | Human/Animal |     |
| <i>Lactobacillus antri</i>                | DSM-16041  | Human/Animal |     |
| <i>Lactobacillus apodemii</i>             | DSM-16634  | Human/Animal | Yes |
| <i>Lactobacillus aviarius araffinosus</i> | DSM-20653  | Human/Animal |     |
| <i>Lactobacillus aviarius aviarius</i>    | DSM-20655  | Human/Animal |     |
| <i>Lactobacillus brantae</i>              | DSM-23927  | Human/Animal |     |
| <i>Lactobacillus brevis</i>               | DSM-20054  | Human/Animal |     |
| <i>Lactobacillus ceti</i>                 | DSM-22408  | Human/Animal |     |
| <i>Lactobacillus coleohominis</i>         | DSM-14060  | Human/Animal |     |
| <i>Lactobacillus crispatus</i>            | DSM-20584  | Human/Animal | Yes |
| <i>Lactobacillus equi</i>                 | DSM-15833  | Human/Animal |     |
| <i>Lactobacillus equicursoris</i>         | DSM-19284  | Human/Animal | Yes |
| <i>Lactobacillus equigenerosi</i>         | DSM-18793  | Human/Animal |     |
| <i>Lactobacillus fermentum</i>            | DSM-20055  | Human/Animal |     |
| <i>Lactobacillus gallinarum</i>           | DSM-10532  | Human/Animal | Yes |
| <i>Lactobacillus gasseri</i>              | ATCC-33323 | Human/Animal |     |
| <i>Lactobacillus gastricus</i>            | DSM-16045  | Human/Animal | Yes |
| <i>Lactobacillus gigeriorum</i>           | DSM-23908  | Human/Animal | Yes |
| <i>Lactobacillus hamsteri</i>             | DSM-5661   | Human/Animal | Yes |
| <i>Lactobacillus hayakitensis</i>         | DSM-18933  | Human/Animal |     |
| <i>Lactobacillus hominis</i>              | DSM-23910  | Human/Animal | Yes |
| <i>Lactobacillus iners</i>                | DSM-13335  | Human/Animal |     |
| <i>Lactobacillus ingluviei</i>            | DSM-15946  | Human/Animal |     |
| <i>Lactobacillus ingluviei</i>            | DSM-14792  | Human/Animal |     |
| <i>Lactobacillus intestinalis</i>         | DSM-6629   | Human/Animal | Yes |
| <i>Lactobacillus jensenii</i>             | DSM-20557  | Human/Animal |     |
| <i>Lactobacillus johnsonii</i>            | ATCC-33200 | Human/Animal | Yes |
| <i>Lactobacillus kalixensis</i>           | DSM-16043  | Human/Animal | Yes |
| <i>Lactobacillus kitasatonis</i>          | DSM-16761  | Human/Animal | Yes |
| <i>Lactobacillus mucosae</i>              | DSM-13345  | Human/Animal |     |
| <i>Lactobacillus murinus</i>              | DSM-20452  | Human/Animal | Yes |
| <i>Lactobacillus oligofermentans</i>      | DSM-15707  | Human/Animal |     |
| <i>Lactobacillus oris</i>                 | DSM-4864   | Human/Animal |     |
| <i>Lactobacillus pantheris</i>            | DSM-15945  | Human/Animal |     |
| <i>Lactobacillus parabuchneri</i>         | DSM-5707   | Human/Animal | Yes |
| <i>Lactobacillus psittaci</i>             | DSM-15354  | Human/Animal |     |
| <i>Lactobacillus rennini</i>              | DSM-20253  | Human/Animal |     |

---

**Supplementary Table 1.** Continued

|                                                |             |              |     |
|------------------------------------------------|-------------|--------------|-----|
| <i>Lactobacillus reuteri</i>                   | DSM-20016   | Human/Animal |     |
| <i>Lactobacillus ruminis</i>                   | DSM-20403   | Human/Animal |     |
| <i>Lactobacillus saerimneri</i>                | DSM-16049   | Human/Animal |     |
| <i>Lactobacillus salivarius</i>                | DSM-20555   | Human/Animal |     |
| <i>Lactobacillus saniviri</i>                  | DSM-24301   | Human/Animal |     |
| <i>Lactobacillus senioris</i>                  | DSM-24302   | Human/Animal |     |
| <i>Lactobacillus ultunensis</i>                | DSM-16047   | Human/Animal | Yes |
| <i>Lactobacillus vaccिनostercus</i>            | DSM-20634   | Human/Animal |     |
| <i>Lactobacillus vaginalis</i>                 | DSM-5837    | Human/Animal |     |
| <i>Olsenella uli</i>                           | DSM-7084    | Human/Animal |     |
| <i>Fructobacillus fructosus</i>                | DSM-20349   | Plant        |     |
| <i>Lactobacillus buchneri</i>                  | DSM-20057   | Plant        |     |
| <i>Lactobacillus cacaonum</i>                  | DSM-21116   | Plant        |     |
| <i>Lactobacillus camelliae</i>                 | DSM-22697   | Plant        |     |
| <i>Lactobacillus coryniformis coryniformis</i> | DSM-20001   | Plant        |     |
| <i>Lactobacillus dextrinicus</i>               | DSM-20335   | Plant        |     |
| <i>Lactobacillus diolivorans</i>               | DSM-14421   | Plant        |     |
| <i>Lactobacillus fabifermentans</i>            | DSM-21115   | Plant        |     |
| <i>Lactobacillus floricola</i>                 | DSM-23037   | Plant        |     |
| <i>Lactobacillus florum</i>                    | DSM-22689   | Plant        |     |
| <i>Lactobacillus ghanensis</i>                 | DSM-18630   | Plant        |     |
| <i>Lactobacillus graminis</i>                  | DSM-20719   | Plant        | Yes |
| <i>Lactobacillus hokkaidonensis</i>            | DSM-26202   | Plant        | Yes |
| <i>Lactobacillus hordei</i>                    | DSM-19519   | Plant        | Yes |
| <i>Lactobacillus manihotivorans</i>            | DSM-13343   | Plant        |     |
| <i>Lactobacillus nasuensis</i>                 | JCM-17158   | Plant        |     |
| <i>Lactobacillus ozensis</i>                   | DSM-23829   | Plant        |     |
| <i>Lactobacillus plantarum</i>                 | DSM-13273   | Plant        | Yes |
| <i>Lactobacillus plantarum argentoratensis</i> | DSM-16365   | Plant        |     |
| <i>Lactobacillus pobuzihii</i>                 | NBRC-103219 | Plant        |     |
| <i>Lactobacillus pobuzihii.Chen</i>            | KCTC-13174  | Plant        |     |
| <i>Lactobacillus sucicola</i>                  | DSM-21376   | Plant        |     |
| <i>Lactobacillus taiwanensis</i>               | DSM-21401   | Plant        | Yes |
| <i>Lactobacillus thailandensis</i>             | DSM-22698   | Plant        |     |
| <i>Lactobacillus uvarum</i>                    | DSM-19971   | Plant        |     |
| <i>Lactobacillus vini</i>                      | DSM-20605   | Plant        |     |
| <i>Pediococcus lolii</i>                       | DSM-19927   | Plant        |     |
| <i>Pediococcus parvulus</i>                    | DSM-20332   | Plant        |     |
| <i>Pediococcus stilesii</i>                    | DSM-18001   | Plant        |     |
| <i>Weissella confusa</i>                       | DSM-20196   | Plant        |     |
| <i>Lactobacillus fructivorans</i>              | DSM-20203   | Unknown      |     |
| <i>Lactobacillus paracasei paracasei</i>       | DSM-5622    | Unknown      | Yes |
| <i>Lactobacillus pasteurii</i>                 | DSM-23907   | Unknown      | Yes |
| <i>Lactobacillus pentosus</i>                  | DSM-20314   | Unknown      | Yes |
| <i>Lactobacillus rhamnosus</i>                 | DSM-20021   | Unknown      | Yes |
| <i>Leuconostoc mesenteroides cremoris</i>      | ATCC-19254  | Unknown      |     |

**Supplementary Table 1.** Continued

---

|                                             |               |                       |     |
|---------------------------------------------|---------------|-----------------------|-----|
| <i>Pediococcus acidilactici</i>             | AS1-2696      | Unknown               |     |
| <i>Lactobacillus amylolyticus</i>           | DSM-11664     | Wine/Alcohol Products | Yes |
| <i>Lactobacillus composti</i>               | DSM-18527     | Wine/Alcohol Products |     |
| <i>Lactobacillus delbrueckii jakobsenii</i> | DSM-26046     | Wine/Alcohol Products |     |
| <i>Lactobacillus farraginis</i>             | DSM-18382     | Wine/Alcohol Products | Yes |
| <i>Lactobacillus fructivorans</i>           | ATCC-27394    | Wine/Alcohol Products |     |
| <i>Lactobacillus fructivorans</i>           | DSM-20350     | Wine/Alcohol Products |     |
| <i>Lactobacillus helveticus</i>             | LMG-22464     | Wine/Alcohol Products | Yes |
| <i>Lactobacillus hilgardii</i>              | DSM-20176     | Wine/Alcohol Products |     |
| <i>Lactobacillus homohiochii</i>            | DSM-20571     | Wine/Alcohol Products |     |
| <i>Lactobacillus kunkeei</i>                | DSM-12361     | Wine/Alcohol Products |     |
| <i>Lactobacillus lindneri</i>               | DSM-20690     | Wine/Alcohol Products |     |
| <i>Lactobacillus malefermentans</i>         | DSM-5705      | Wine/Alcohol Products |     |
| <i>Lactobacillus mali</i>                   | DSM-20444     | Wine/Alcohol Products |     |
| <i>Lactobacillus mali</i>                   | ATCC-27304    | Wine/Alcohol Products |     |
| <i>Lactobacillus nagelii</i>                | DSM-13675     | Wine/Alcohol Products |     |
| <i>Lactobacillus oeni</i>                   | DSM-19972     | Wine/Alcohol Products |     |
| <i>Lactobacillus parabuchneri</i>           | DSM-15352     | Wine/Alcohol Products |     |
| <i>Lactobacillus parafarraginis</i>         | DSM-18390     | Wine/Alcohol Products | Yes |
| <i>Lactobacillus paralimentarius</i>        | DSM-19674     | Wine/Alcohol Products |     |
| <i>Lactobacillus paraplantarum</i>          | DSM-10667     | Wine/Alcohol Products | Yes |
| <i>Lactobacillus paucivorans</i>            | DSM-22467     | Wine/Alcohol Products |     |
| <i>Lactobacillus sakei sakei</i>            | DSM-20017     | Wine/Alcohol Products |     |
| <i>Lactobacillus satsumensis</i>            | DSM-16230     | Wine/Alcohol Products |     |
| <i>Lactobacillus similis</i>                | DSM-23365     | Wine/Alcohol Products |     |
| <i>Lactobacillus zeae</i>                   | DSM-20178     | Wine/Alcohol Products | Yes |
| <i>Oenococcus kitaharae</i>                 | DSM-17330     | Wine/Alcohol Products |     |
| <i>Oenococcus oeni</i>                      | ATCC-BAA-1163 | Wine/Alcohol Products | Yes |
| <i>Pediococcus cellicola</i>                | DSM-17757     | Wine/Alcohol Products |     |
| <i>Pediococcus claussenii</i>               | DSM-14800     | Wine/Alcohol Products | Yes |
| <i>Pediococcus damnosus</i>                 | DSM-20331     | Wine/Alcohol Products | Yes |
| <i>Pediococcus ethanolidurans</i>           | DSM-22301     | Wine/Alcohol Products |     |
| <i>Pediococcus inopinatus</i>               | DSM-20285     | Wine/Alcohol Products |     |
| <i>Pediococcus pentosaceus</i>              | DSM-20336     | Wine/Alcohol Products |     |

---

**Supplementary Table 2** Bacteriocin Genes Including Leader Sequences

| Species                                        | Strain       | Potential Unmodified Lantibiotic Peptide                                                                                                                                                                                               |
|------------------------------------------------|--------------|----------------------------------------------------------------------------------------------------------------------------------------------------------------------------------------------------------------------------------------|
| <b>Lantipeptides</b>                           |              |                                                                                                                                                                                                                                        |
| <i>L. taiwanensis</i>                          | DSM 21401    | MKELNLDVEKFDLADNLEVILEANGV-TSTGCCNGPSKLQG                                                                                                                                                                                              |
| <i>L. amylovorus</i>                           | DSM 20531    | MTESALLDLKIDESAVNAFDAEGY-AKSYSAYSSCSCVNPCCIATMD                                                                                                                                                                                        |
| <i>L. gastricus</i>                            | DSM 16045    | MSKEELNSIVGRAFEEMDIQQMTSIQGS-GTETAQSTPAISRVLTSIARKSSAKISWISFISAGLNSYKSKC                                                                                                                                                               |
| <i>P. damnosus</i><br>(Pediocin PD-1)          | DSM 20331    | MKKNLMSAEESGNVLEELNNAQLGMISGG-KKIKKSSSGDICTLTSECDHLATWVCC                                                                                                                                                                              |
| <b>Class IIa Bacteriocins</b>                  |              |                                                                                                                                                                                                                                        |
| <i>L. hordei</i>                               | DSM 19519    | MKKIEKLTEKEMANIIGG-KYYGNGVTCGKHSCSDVWGKATTCIINNGAMAWATGGHQGTHKC<br>MKKEIELSEKELVRIIGG-KYYGNGVSTCKKHGCKVNWGQAFTCVNRNFANFGHGNC                                                                                                           |
| <i>L. acidiphiscis</i>                         | DSM 15836    | LSLEESSVIGG-KYYGNGLHPKHGKPYINWQAIQSIGKISYHGWVNGITSGAAGVGRH                                                                                                                                                                             |
| <i>L. futsaii</i>                              | JCM 17355    | MKGRYVNMKKVIDENSLISLISGG-KYYGNGVSCGKHTCKVNWGQAWNESVNRWGSWVNLGTLRQH                                                                                                                                                                     |
| <i>C. maltaromaticum</i>                       | DSM 20722    | MKSVKELNKKEMQQIN-AISYNGVYCNKEKCWVNKAENKQAITGIVIGGWASSLAGMGMH<br>MNSVKELNVKEMKQLHGG-VYYGNGVSCSKTKCSVNWGQAFQERYTAGINSFVSGVASGAGSIRRP                                                                                                     |
| <i>L. agilis</i>                               | DSM 20509    | MSDKMENKKLTTADLAKVTGG-SRYGNGITCGKHCTVNWGQAWTCGVNRLANFGHGNC                                                                                                                                                                             |
| <i>L. aquaticus</i>                            | DSM 21051    | MNGG-KNYGNGVYCTKKHGKVDWGWQAWSIIGNSAANSTRGAAGWKS                                                                                                                                                                                        |
| <i>L. rennini</i>                              | DSM 20253    | MLSKEELTQVNGG-KYYGNGVSCSKHSCSDVWGKALTCTINNGAMAWTTGGHQGNHHC                                                                                                                                                                             |
| <i>L. ruminis</i>                              | DSM 20403    | MRQLSEKELKIMGG-KYYGNGVYCGKHKCRVDWGWQAWGCSVNRWGAAVGTGGKATIGHC                                                                                                                                                                           |
| <i>P. pentosaceus</i>                          | DSM 20336    | MKKIEKLTEKEMANIIGG-KYYGNGLYCGKHSCSDVWGKATTCIINNGAMAWATGGHQGTHKC                                                                                                                                                                        |
| <i>C. maltaromaticum</i>                       | DSM 20342    | MKSVKELNKKEMQQINGG-AISYNGVYCNKEKCWVNKAENKQAITGIVIGGWASSLAGMGMH                                                                                                                                                                         |
| <b>Class IIb Bacteriocins</b>                  |              |                                                                                                                                                                                                                                        |
| <i>L. murinus</i>                              | DSM 20452    | MENLQMFVDMTEELTEINGG-YNRLAQQGHYTGKAVIVGATVGLIASLF<br>MNNAELNLFEELESTDLQNIIVGG-KRGLGYHIVDAVVSFGKGLDAF<br>MNKFQVITDLSQIKGG-YDIEKALWGGYGYQLGWRNKWNLSHRYFKI<br>MEKLEDFKPLDTKATSSIVGG-GVPGWYYGMLWKIGVSGYKHKRDMINGFDRGFNNYPK                 |
| <i>L. acidophilus</i>                          | DSM 20079    | MNKFKDLNELELSNIAGG-SNNIFWTRVGVGAAEARCMIKPSLGNWTTKAVSCGAKGLYAAVVRG<br>MKKKILESDLNIIKGG-VAPIVYPIAGYVMKQMFHSDQIIGFKRGGWKYK                                                                                                                |
| <i>L. taiwanensis</i>                          | DSM 21401    | MKLNDKELSKIVGG-NRWGDTVLSAASGAGTGKACKSFGPWGMAICGSNRRLFVLYS<br>MKQFNLYSHKDLAVVVG-G-RNNWQTNVGGAVGSAMIGATVGGTICGPACAVAGAHYLPILWGTVAATGGFGKIRK                                                                                              |
| <i>L. crispatus</i>                            | DSM 20584    | MKQLNSEQLQNIIGG-NRWNTNAYSALGCAVPGVKYKGLGGVWAVIGGVGAAVCGLAGYVVRG<br>MSKVEVLNEEELTVVVG-SKGGKRNWAGNTIGVSSAATGAALGSAICGPGCGFVGAHWGAVGWAVASFSGAFKIRK                                                                                        |
| <i>L. nantensis</i>                            | DSM 16982    | MKSLNKFSTISEKNLDCNCGG-SFKGFVQGFINGLTGKKH<br>MKKYKIDNNTLKNISGG-KGPWNYKTGYNLGKWISKRF                                                                                                                                                     |
| <i>L. apodemi</i>                              | DSM 16634    | MNKFQVITDLNIIKGG-YDIEKALWGGYGYQLGWRNKWNLSHRYFKI<br>MDKLEFKLLDTKATSSIVGG-GVPGWYYSMMLWKIGVSGYKHKRDMINGFDRGFNNYPK<br>MKIKLTVLNEFEELTADAENISGG-RRSRKNGIGYAIYAFGAVERAVLGGSRDYNK                                                             |
| <i>L. plantarum</i>                            | DSM 13273    | MTVNKMIKDLVDVDAFAPISNNKLVVGG-GAWKNFWSLRKGFYDGEAGRAIRR<br>MLQFEKLQYSRPLQKKLAKISGG-FNRGGYVFGKSVRHHVDAIGSVAGIRGILKSIR<br>MKKFLVLRDRELNISGG-VFHAYSARGVRNNYKSAVGPADWVISAVRGIHGG<br>MKIKLTVLNEFEELTADAENISGG-RRSRKNGIGYAIYAFGAVERAVLGGSRDYNK |
| <i>L. plantarum</i> subsp.<br><i>plantarum</i> | CGMCC 1.2437 | MTVNKMIKDLVDVDAFAPISNNKLVVGG-GAWKNFWSLRKGFYDGEAGRAIRR<br>MLQFEKLQYSRPLQKKLAKISGG-FNRGGYVFGKSVRHHVDAIGSVAGIRGILKSIR<br>MKKFLVLRDRELNISGG-VFHAYSARGVRNNYKSAVGPADWVISAVRGIHGG                                                             |
| <i>L. paraplantarum</i>                        | DSM 10667    | LPQKKLAKISGG-FNRGGYVFGKSVRHHVDAIGSVAGIRGILKSIR<br>MKKFLVLRDRELNISGG-VFHAYSARGVRNNYKSAVGPADWVISAVRGIHGG                                                                                                                                 |
| <i>L. intestinalis</i>                         | DSM 6629     | MVTKFKTMNLKELENTIGG-RHSVPYSYGYQSGRFGKAAAAAYNIKTVASFFE<br>MKDVTYKFEKLDLQSLKIVGG-KRKHHPWYYSIQEFGRGFLAGLASKYNL                                                                                                                            |
| <i>L. rhamnosus</i>                            | DSM 20021    | MTKLNEAELSKISGG-IGPLAIPVAAILGFLATDAWSHADELVAGVKQGWERS<br>MDHLKTLNTADLISGG-DNGLNLTWFIGKAIGSTARSWAEGAMFAPAIKPAKEIVDKLNGN                                                                                                                 |
| <i>L. zeae</i>                                 | DSM 20178    | MNTVSNRNFNTVEDELSVVSOGG-NAWGNVANGALNGAATGARFGKNLGPWGMIGGMALGAGIGGYFYNG<br>MDSELTDVVGG-RNTWQQNVSGVAGAAAGGAALGAVVGGPAGAFGLAHYGPILWTAVTGFTGGF                                                                                             |
| <i>Leuc. fallax</i>                            | KCTC 3537    | MEKLSEQLAKASGG-CPLPIVVTVAASGAHFVAKDGNHLDQIRSGWRKSGNSKW<br>MDFKTQPNVLSLEKLMISGG-STDGSWEDFGAGLHKTVNTVIYAGTTVARAHRSHQRCFTGNKW                                                                                                             |

Supplementary Table 2. Continued

| Species                                  | Strain      | Potential Unmodified Lantibiotic Peptide                                                                                                        |
|------------------------------------------|-------------|-------------------------------------------------------------------------------------------------------------------------------------------------|
| <b>Class II d Bacteriocins</b>           |             |                                                                                                                                                 |
| <i>L. paralimentarius</i>                | DSM 13961   | MSKFKELSITELYKTSGG-NFFGGSSNGYSWRDCKGHWHYTVTSGVSSSTVAQIINGWGSAGAPGVGQR                                                                           |
| <i>L. pentosus</i>                       | DSM 20314   | MQKIAGG-KSNTYSLQMGSVVRTATKIFKKMEW                                                                                                               |
| <i>L. hokkaidonensis</i>                 | DSM 26202   | MKFKKLSEKELQKINGG-VTLVATHSKNGLKFFKWRKL                                                                                                          |
| <i>L. xiangfangensis</i>                 | LMG 26013   | MNSQKVLISSELSNVIGG-KLVKLYTAEPTYFYRDRTRTKKIVMRQTTGYS AHLQHVADGWVRS AHL                                                                           |
| <i>L. paracasei</i>                      | DSM 5622    | MKQFDEQKMNMSDEELGFIGG-DSIRDVSPTFNKIRRFDFGLFK                                                                                                    |
| <i>L. murinus</i>                        | DSM 20452   | MNKFQVITDLSQIKGG-YDIEKALWGGYGYQLGWRNKWNLSHRYFKI                                                                                                 |
| <i>Leuc. kimchii</i>                     | IMSNU 11154 | MQDVKYRELSAEELSVIAGG-KSFWWSADASSWLSGPQPNSPLLKKR                                                                                                 |
| <i>Leuc. geldium</i>                     | KCTC 3527   | MKSLQDFQTMNHTQLAQVNGG-KRVYIPNGGAWLDSNTGKGGVDWNVAVPALGSIMVNGWAQNGPLAHLHP                                                                         |
| <i>C. maltaromaticum</i> (cbnX)          | DSM 20722   | MKSVKELNVKEMQQTIGG-WGWKEVQNGQTIFSAGQKLGNMVGVKIVPLPFG                                                                                            |
| <b>Lactococcin 972 like Bacteriocins</b> |             |                                                                                                                                                 |
| <i>L. equicursoris</i>                   | DSM 19284   | MNKIKSFAVAVFATTAIAFSAVPV LASSYVIDAQ-<br>GGTWN YGVGSKYVWSYSHNSKTHKASVEGKYVVTSGWIK EKTQARASAAKAAAGNQSYDVK<br>MKS AKKLMTAFAVTAGLLGTG VGS AVMAASVG- |
| <i>L. amylophilus</i>                    | DSM 20533   | GGTWN YGVGLTGF GYS DYLNHNSKTHSASVGR TKSDCNKVT KTKGVWQA SKYTKIPPTGLN YWWSVS<br>MASAQ AASADIP IASGQ MELTQGQTPIMSCISKG-                            |
| <i>L. graminis</i>                       | DSM 20719   | GGTWS YGFSGTKVYSQYHGSKKHSATAKNGW GAGVRNTQKAGIWAYSSVNSTLGNKTYWAVY<br>MKKSKLIASLTATCAAVMLSTSPVLAATVYEH-                                           |
| <i>L. hamsteri</i>                       | DSM 5661    | GGVWN YGVGKKYVWSYSHHRLTHKSSVEGKYSSG WVSPGTEARASAEKAQHGNKSYDFVE<br>MNKFKKVLTGV IASGIFSGISFAHADQVG-                                               |
| <i>Leuc. argentinum</i>                  | KCTC 3773   | GGDWRHG VGSYVWSYFHNYR NHSSVSGQYF ASSGR TSPGYDAQASAPKSLFGNKAYDFW                                                                                 |



**Supplementary Table 3.** Bacterial strains screened for bacteriocin production

| Species                                                      | Strain       | Growth Medium               | Condition | Temp (°C) |
|--------------------------------------------------------------|--------------|-----------------------------|-----------|-----------|
| <i>Carnobacterium maltaromaticum</i>                         | DSM 20342    | TSA                         | Aerobic   | 30        |
| <i>Carnobacterium maltaromaticum</i>                         | DSM 20722    | TSA                         | Aerobic   | 30        |
| <i>Carnobacterium maltaromaticum</i>                         | DSM 20730    | TSA                         | Aerobic   | 30        |
| <i>Lactobacillus acidipiscis</i>                             | DSM 15836    | MRS + Vitamin soln.         | Anaerobic | 30        |
| <i>Lactobacillus acidophilus</i>                             | DSM 20079    | mMRS                        | Anaerobic | 37        |
| <i>Lactobacillus agilis</i>                                  | DSM 20509    | mMRS                        | Anaerobic | 38        |
| <i>Lactobacillus amylophilus</i>                             | DSM 20533    | MRS                         | Aerobic   | 30        |
| <i>Lactobacillus amylovorus</i>                              | DSM 16698    | MRS                         | Anaerobic | 37        |
| <i>Lactobacillus amylovorus</i>                              | DSM 20531    | MRS                         | Anaerobic | 37        |
| <i>Lactobacillus apodemii</i>                                | DSM 16634    | MRS                         | Anaerobic | 37        |
| <i>Lactobacillus aquaticus</i>                               | DSM 21051    | MRS                         | Anaerobic | 37        |
| <i>Lactobacillus buchneri</i>                                | DSM 20057    | MRS                         | Aerobic   | 37        |
| <i>Lactobacillus casei</i>                                   | DSM 20011    | MRS                         | Aerobic   | 30        |
| <i>Lactobacillus composti</i>                                | DSM 18527    | MRS                         | Anaerobic | 30        |
| <i>Lactobacillus coryniformis</i> subsp. <i>coryniformis</i> | DSM 20001    | MRS                         | Aerobic   | 30        |
| <i>Lactobacillus coryniformis</i> subsp. <i>torquens</i>     | DSM 20004    | MRS                         | Aerobic   | 30        |
| <i>Lactobacillus crispatus</i>                               | DSM 20584    | mMRS                        | Anaerobic | 37        |
| <i>Lactobacillus equicursoris</i>                            | DSM 19284    | MRS                         | Anaerobic | 37        |
| <i>Lactobacillus fabifermentans</i>                          | DSM 21115    | MRS                         | Anaerobic | 30        |
| <i>Lactobacillus fuchuensis</i>                              | DSM 14340    | MRS                         | Aerobic   | 20        |
| <i>Lactobacillus futsaii</i>                                 | JCM 17355    | MRS                         | Aerobic   | 30        |
| <i>Lactobacillus gastricus</i>                               | DSM 16045    | MRS                         | Anaerobic | 37        |
| <i>Lactobacillus graminis</i>                                | DSM 16045    | MRS                         | Aerobic   | 30        |
| <i>Lactobacillus hamsteri</i>                                | DSM 5661     | MRS                         | Anaerobic | 37        |
| <i>Lactobacillus harbinensis</i>                             | DSM 16991    | MRS                         | Anaerobic | 37        |
| <i>Lactobacillus helveticus</i>                              | CGMCC 1.1877 | MRS                         | Anaerobic | 37        |
| <i>Lactobacillus helveticus</i>                              | LMG 22464    | MRS                         | Anaerobic | 37        |
| <i>Lactobacillus hokkaidonensis</i>                          | DSM 26202    | MRS                         | Anaerobic | 25        |
| <i>Lactobacillus hordei</i>                                  | DSM 19519    | MRS                         | Anaerobic | 30        |
| <i>Lactobacillus intestinalis</i>                            | DSM 6629     | MRS                         | Aerobic   | 37        |
| <i>Lactobacillus johnsonii</i>                               | DSM 10533    | MRS                         | Anaerobic | 37        |
| <i>Lactobacillus kalixensis</i>                              | DSM 16043    | MRS                         | Aerobic   | 37        |
| <i>Lactobacillus kimchicus</i>                               | JCM 15530    | MRS                         | Aerobic   | 37        |
| <i>Lactobacillus kimchiensis</i>                             | DSM 24716    | MRS                         | Anaerobic | 25        |
| <i>Lactobacillus kitasatonis</i>                             | DSM 16761    | MRS                         | Anaerobic | 37        |
| <i>Lactobacillus mali</i>                                    | DSM 20444    | MRS                         | Aerobic   | 30        |
| <i>Lactobacillus mindensis</i>                               | DSM 14500    | MRS                         | Anaerobic | 30        |
| <i>Lactobacillus murinus</i>                                 | DSM 20452    | MRS                         | Aerobic   | 37        |
| <i>Lactobacillus nantensis</i>                               | DSM 16982    | mMRS + 1% maltose + 0.5% YE | Aerobic   | 30        |
| <i>Lactobacillus nodensis</i>                                | DSM 19682    | MRS                         | Anaerobic | 30        |
| <i>Lactobacillus otakiensis</i>                              | DSM 19908    | MRS                         | Anaerobic | 30        |

Supplementary Table 3. Continued

| Species                                                      | Strain        | Growth Medium               | Condition | Temp (°C) |
|--------------------------------------------------------------|---------------|-----------------------------|-----------|-----------|
| <i>Lactobacillus parabuchneri</i>                            | DSM 5707      | MRS                         | Aerobic   | 30        |
| <i>Lactobacillus paracasei</i> subsp. <i>paracasei</i>       | DSM 5622      | MRS                         | Aerobic   | 30        |
| <i>Lactobacillus paracasei</i> subsp. <i>tolerans</i>        | DSM 20258     | MRS                         | Aerobic   | 30        |
| <i>Lactobacillus parafarraginis</i>                          | DSM 18390     | MRS                         | Anaerobic | 30        |
| <i>Lactobacillus paralimentarius</i>                         | DSM 13961     | MRS                         | Aerobic   | 30        |
| <i>Lactobacillus paralimentarius</i>                         | DSM 13238     | MRS                         | Aerobic   | 30        |
| <i>Lactobacillus paraplantarum</i>                           | DSM 10667     | MRS                         | Aerobic   | 30        |
| <i>Lactobacillus pasteurii</i>                               | DSM 23907     | MRS                         | Anaerobic | 37        |
| <i>Lactobacillus pentosus</i>                                | DSM 20314     | MRS                         | Aerobic   | 30        |
| <i>Lactobacillus plantarum</i>                               | DSM 13273     | MRS                         | Aerobic   | 37        |
| <i>Lactobacillus plantarum</i> subsp. <i>argentoratensis</i> | DSM 16365     | MRS                         | Anaerobic | 30        |
| <i>Lactobacillus plantarum</i> subsp. <i>plantarum</i>       | DSM 20174     | MRS                         | Aerobic   | 30        |
| <i>Lactobacillus rennini</i>                                 | DSM 20253     | MRS + CAA                   | Aerobic   | 30        |
| <i>Lactobacillus reuteri</i>                                 | DSM 20016     | MRS                         | Aerobic   | 37        |
| <i>Lactobacillus rhamnosus</i>                               | DSM 20021     | MRS                         | Aerobic   | 37        |
| <i>Lactobacillus rossiae</i>                                 | DSM 15814     | MRS + 1% maltose<br>+ 1% YE | Anaerobic | 30        |
| <i>Lactobacillus ruminis</i>                                 | DSM 20403     | MRS                         | Anaerobic | 37        |
| <i>Lactobacillus similis</i>                                 | DSM 23365     | MRS                         | Anaerobic | 37        |
| <i>Lactobacillus taiwanensis</i>                             | DSM 21401     | MRS                         | Anaerobic | 37        |
| <i>Lactobacillus xiangfangensis</i>                          | LMG 26013     | MRS                         | Aerobic   | 30        |
| <i>Lactobacillus zeae</i>                                    | DSM 20178     | MRS                         | Aerobic   | 37        |
| <i>Leuconostoc fallax</i>                                    | DSM 20189     | MRS                         | Aerobic   | 30        |
| <i>Leuconostoc gasicomitatum</i>                             | LMG 18811     | MRS                         | Anaerobic | 22        |
| <i>Leuconostoc gelidum</i> subsp. <i>gelidum</i>             | DSM 5578      | MRS                         | Anaerobic | 25        |
| <i>Leuconostoc lactis</i>                                    | DSM 8581      | MRS                         | Aerobic   | 30        |
| <i>Oenococcus kitaharae</i>                                  | DSM 17330     | mMRS + 10%<br>tomato juice  | Anaerobic | 30        |
| <i>Oenococcus oeni</i>                                       | ATCC-BAA 1163 | MRS                         | Anaerobic | 37        |
| <i>Pediococcus cellicola</i>                                 | DSM 17757     | MRS                         | Anaerobic | 30        |
| <i>Pediococcus claussenii</i>                                | DSM 14800     | MRS pH 5.7                  | Aerobic   | 30        |
| <i>Pediococcus damnosus</i>                                  | DSM 20331     | mMRS pH 5.7                 | Anaerobic | 26        |
| <i>Pediococcus ethanolidurans</i>                            | DSM 22301     | MRS                         | Anaerobic | 37        |
| <i>Pediococcus pentosaceus</i>                               | DSM 20336     | MRS                         | Aerobic   | 30        |
| <i>Pediococcus stilesii</i>                                  | DSM 18001     | MRS                         | Anaerobic | 30        |

**Supplementary Table 4. Indicator Strains**

| <b>Species</b>                                 | <b>Strain</b> | <b>Growth Medium</b> | <b>Conditions</b> | <b>Temp (°C)</b> |
|------------------------------------------------|---------------|----------------------|-------------------|------------------|
| <i>Enterococcus faecium</i>                    | LMG 11423     | MRS                  | Anaerobic         | 37               |
| <i>E. mundtii</i>                              | LMG 10748     | MRS                  | Anaerobic         | 37               |
| <i>E. saccharolyticus</i>                      | LMG 11427     | MRS                  | Anaerobic         | 37               |
| <i>Lactobacillus acidophilus</i>               | LMG 9433      | MRS                  | Anaerobic         | 37               |
| <i>L. agilis</i>                               | LMG 9186      | MRS                  | Anaerobic         | 37               |
| <i>L. amylovorus</i>                           | LMG 9496      | MRS                  | Anaerobic         | 37               |
| <i>L. casei</i>                                | LMG 6904      | mMRS                 | Anaerobic         | 37               |
| <i>L. crispatus</i>                            | LMG 9479      | MRS                  | Anaerobic         | 37               |
| <i>L. delbrueckii</i> subsp. <i>bulgaricus</i> | LMG 6901      | MRS                  | Anaerobic         | 37               |
| <i>L. delbrueckii</i> subsp. <i>lactis</i>     | LMG 7942      | MRS                  | Anaerobic         | 37               |
| <i>L. fermentum</i>                            | LMG 6902      | MRS                  | Anaerobic         | 37               |
| <i>L. johnsonii</i>                            | DSM 10533     | MRS                  | Anaerobic         | 37               |
| <i>L. plantarum</i>                            | LMG 6907      | MRS                  | Anaerobic         | 37               |
| <i>L. rhamnosus</i>                            | GG            | MRS                  | Anaerobic         | 37               |
| <i>Listeria innocua</i>                        | DPC 3572      | BHI                  | Aerobic           | 37               |
| <i>Micrococcus luteus</i>                      | DPC 6275      | BHI                  | Aerobic           | 30               |
| <i>Staphylococcus aureus</i>                   | DPC 5246      | BHI                  | Aerobic           | 37               |
| <i>Salmonella typhimurium</i>                  | LT2           | BHI                  | Aerobic           | 37               |



**Supplementary Figure 2.** Colony MALDI TOF MS and SDS PAGE profiles of the peptides produced by the cells indicate the mass and identity of each bacteriocin produced

**Class I**

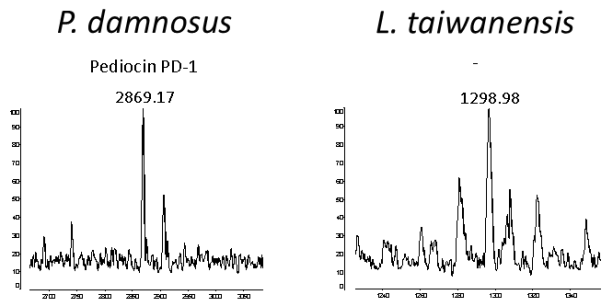

**Class IIa**

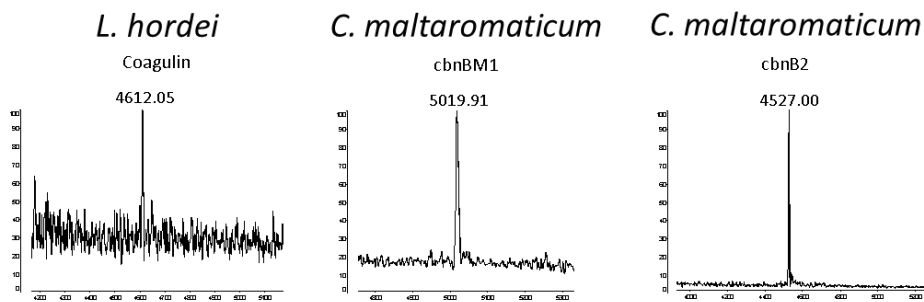

**Class IIb**

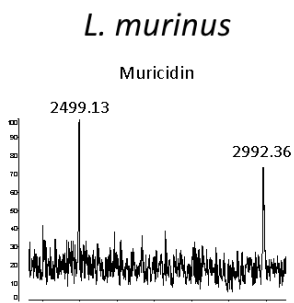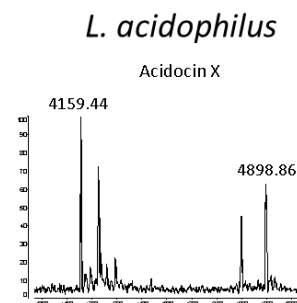

**Class IIc**

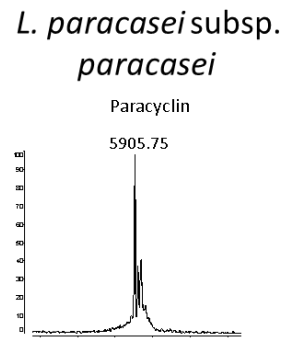

**Class II d**

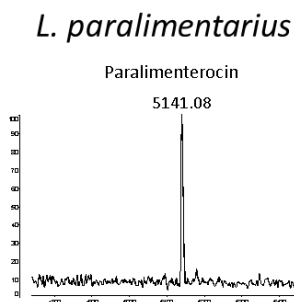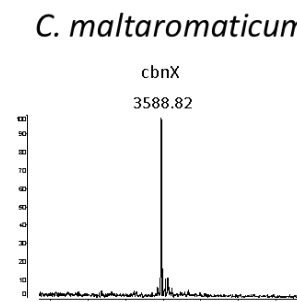

*L. equicursoris*

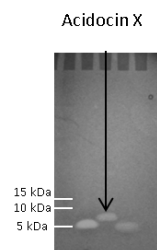

**Figure 3.** An SDS PAGE gel overlayed with the indicator *L. delbrueckii* subsp. *bulgaricus* shows the mass of the antimicrobial helveticin-like peptides produced by these lactobacilli (Unedited gel image can be seen in Supplementary Figure 4).

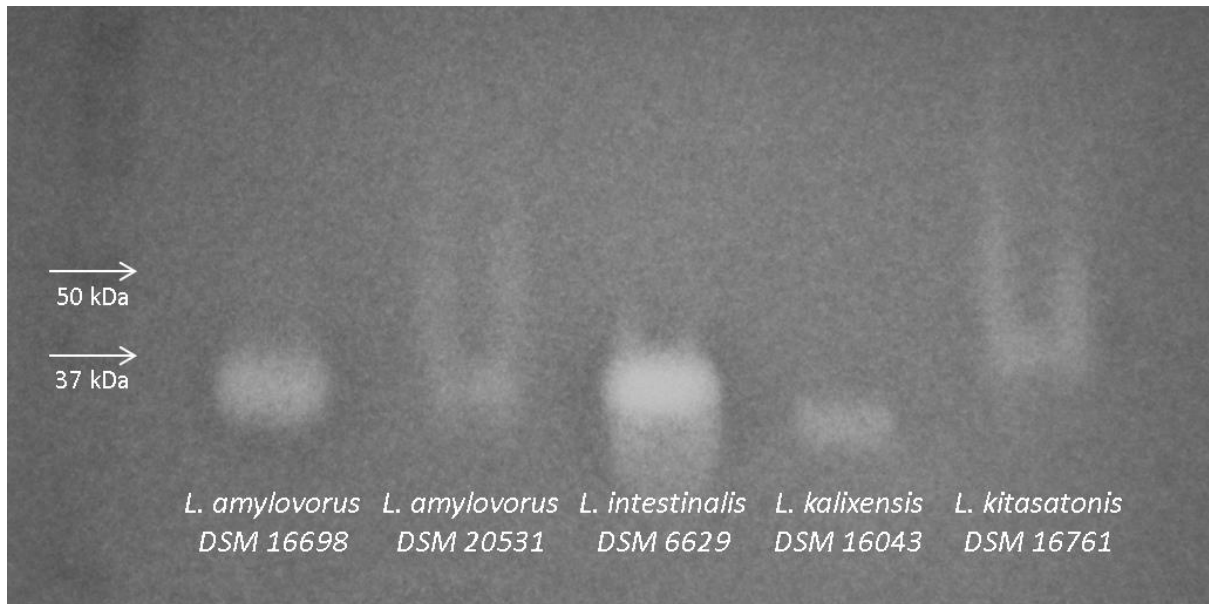

**Supplementary Figure 4.** Unedited SDS Gel overlay displaying zones of inhibition for helveticin like proteins produced by *L. amylovorus* DSM 16698, *L. amylovorus* DSM 20531, *L. intestinal* DSM 6629, *L. kalixensis* 16043 and *L. kitasatonis* DSM 16761

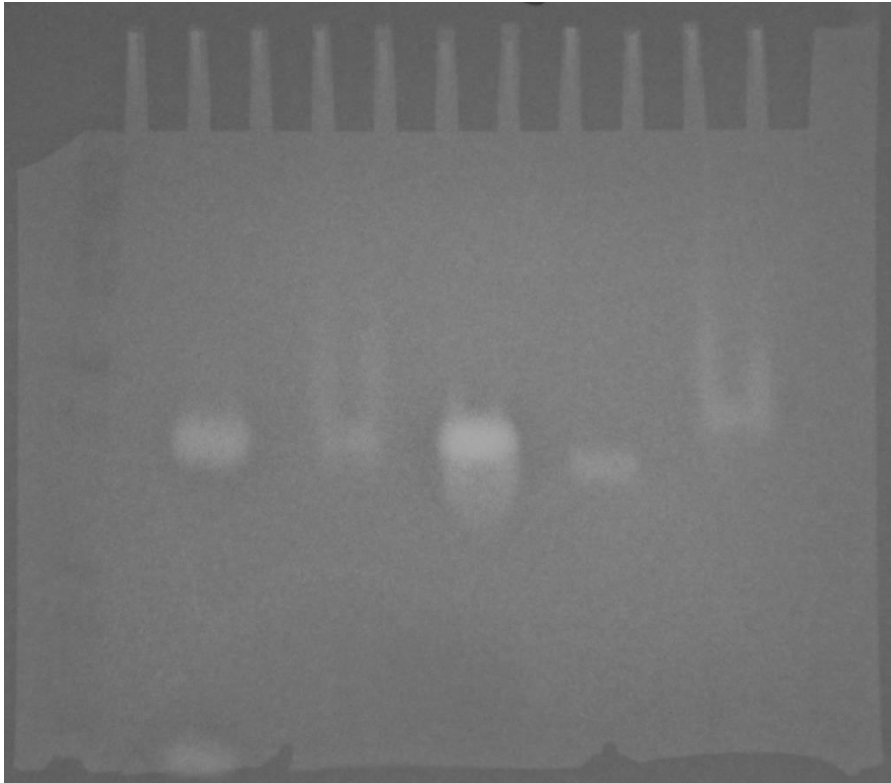

**Supplementary Figure 5.** Unedited SDS Gel overlay displaying zones of inhibition for the production of the bacteriocin 'equicursorin' by *L. equicursoris* DSM 19284 (central lane of gel)

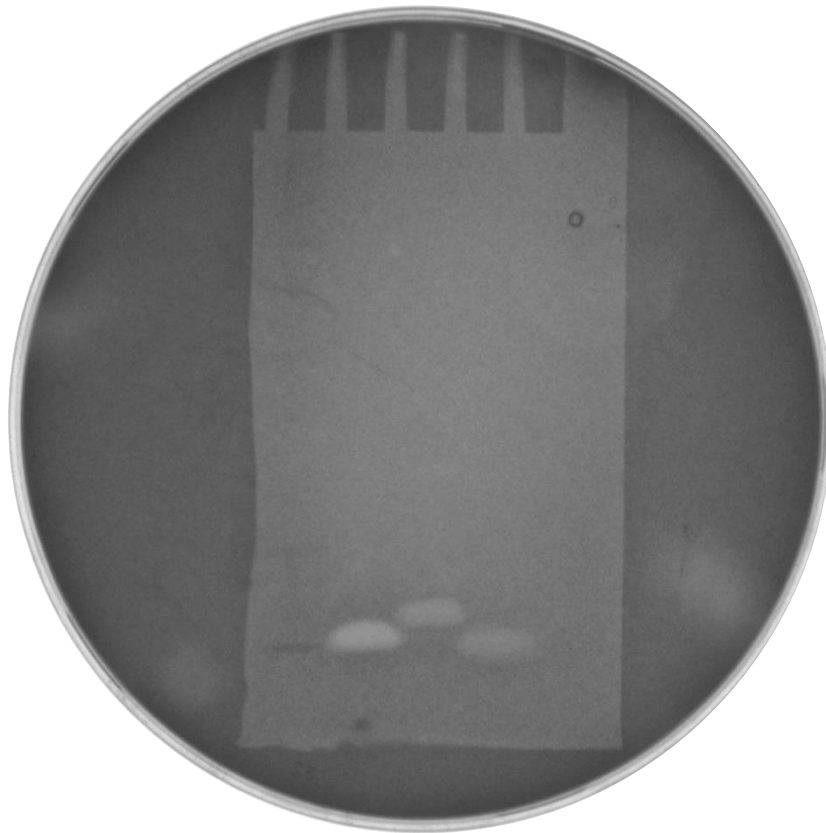

Supplement: 41598_2017_3339_MOESM1_ESM.pdf [file 41598_2017_3339_MOESM1_ESM.pdf]
